Development 139, 2635 (2012) doi:10.1242/dev.085456  
© 2012. Published by The Company of Biologists Ltd

## Apical migration of nuclei during G2 is a prerequisite for all nuclear motion in zebrafish neuroepithelia

**Louis Leung, Abigail V. Kloppe, Stephan W. Grill, William A. Harris and Caren Norden**

There was an error published in *Development* **138**, 5003-5013.

In the Materials and methods section Drug treatments (p. 5004), the working concentration of RO-3306 was incorrect. The correct sentence should read: RO-3306 (Enzo Life Science) was prepared as a 15 mM stock and used at 0.1 mM.

The authors apologise to readers for this mistake.
